# Supplementary material
Source: PubMed Central journal article supplement (PMC2809436)
Supplement: NIHMS162582-supplement-1.pdf [file NIHMS162582-supplement-1.pdf]

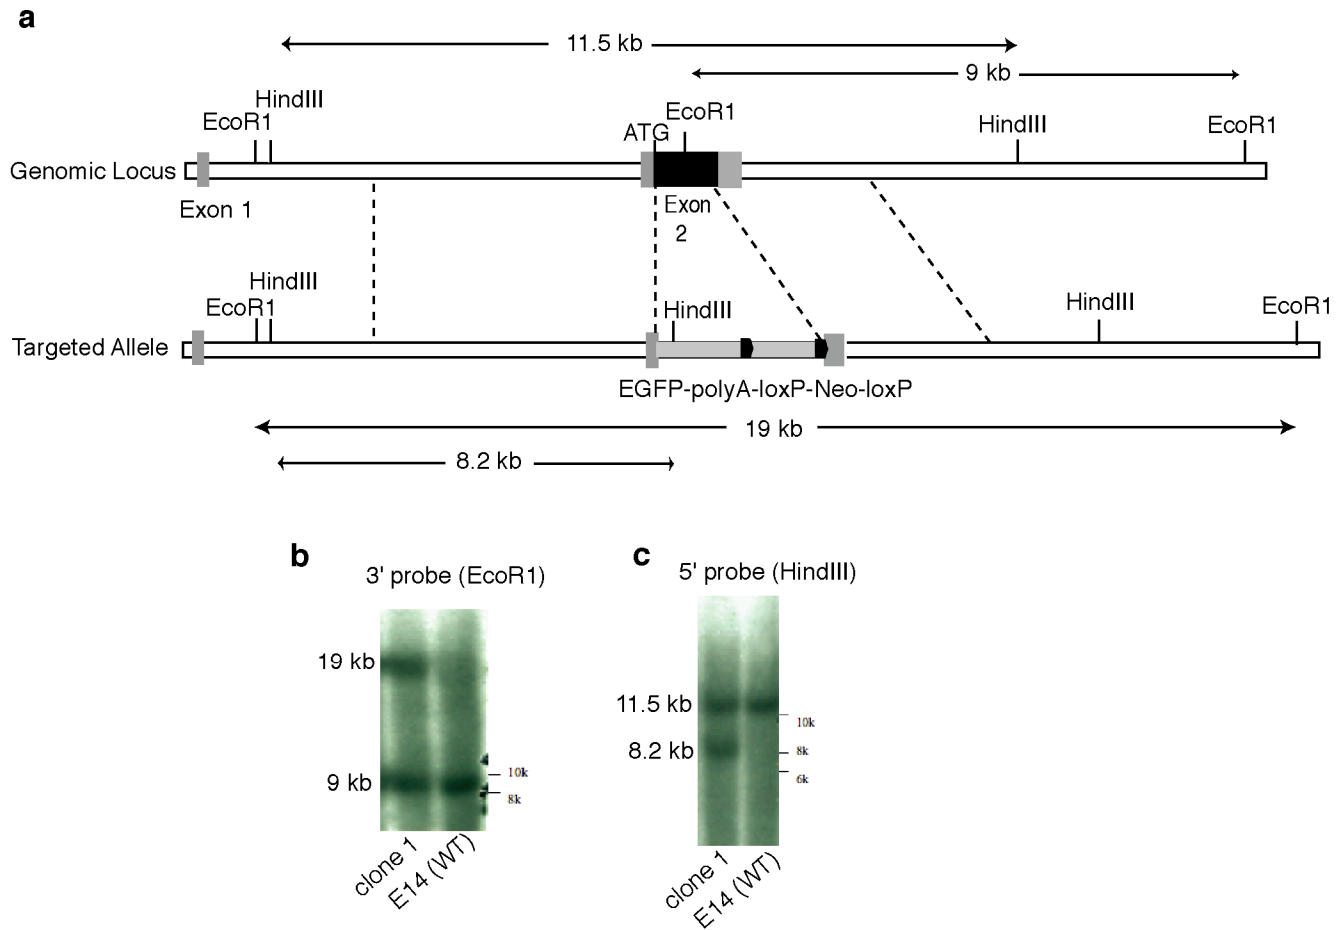

**Supplementary Figure 1.** (a) Schematic of EBI2 genomic locus before and after gene targeting. The entire open reading frame (black box) is encoded in exon 2. The EGFP gene is inserted in place of the EBI2 open reading frame. Gray boxes in genomic locus indicate untranslated regions. Dashed lines indicate the approximate beginning and end of the 5' and 3' homology arms. Restriction enzyme sites used for Southern blot analysis, and size of predicted fragments are indicated. (b) Southern blot analysis of EcoR1-digested genomic DNA from a targeted ES cell clone and from control E14 cells, hybridized with a probe external to the 3' homology arm. (c) Southern blot analysis of HindIII-digested genomic DNA from a targeted ES cell clone and from control E14 cells, hybridized with a probe external to the 5' homology arm.
