# Supplementary material
Source: PubMed Central journal article supplement (PMC2809436)
Supplement: NIHMS162582-supplement-3.pdf [file NIHMS162582-supplement-3.pdf]

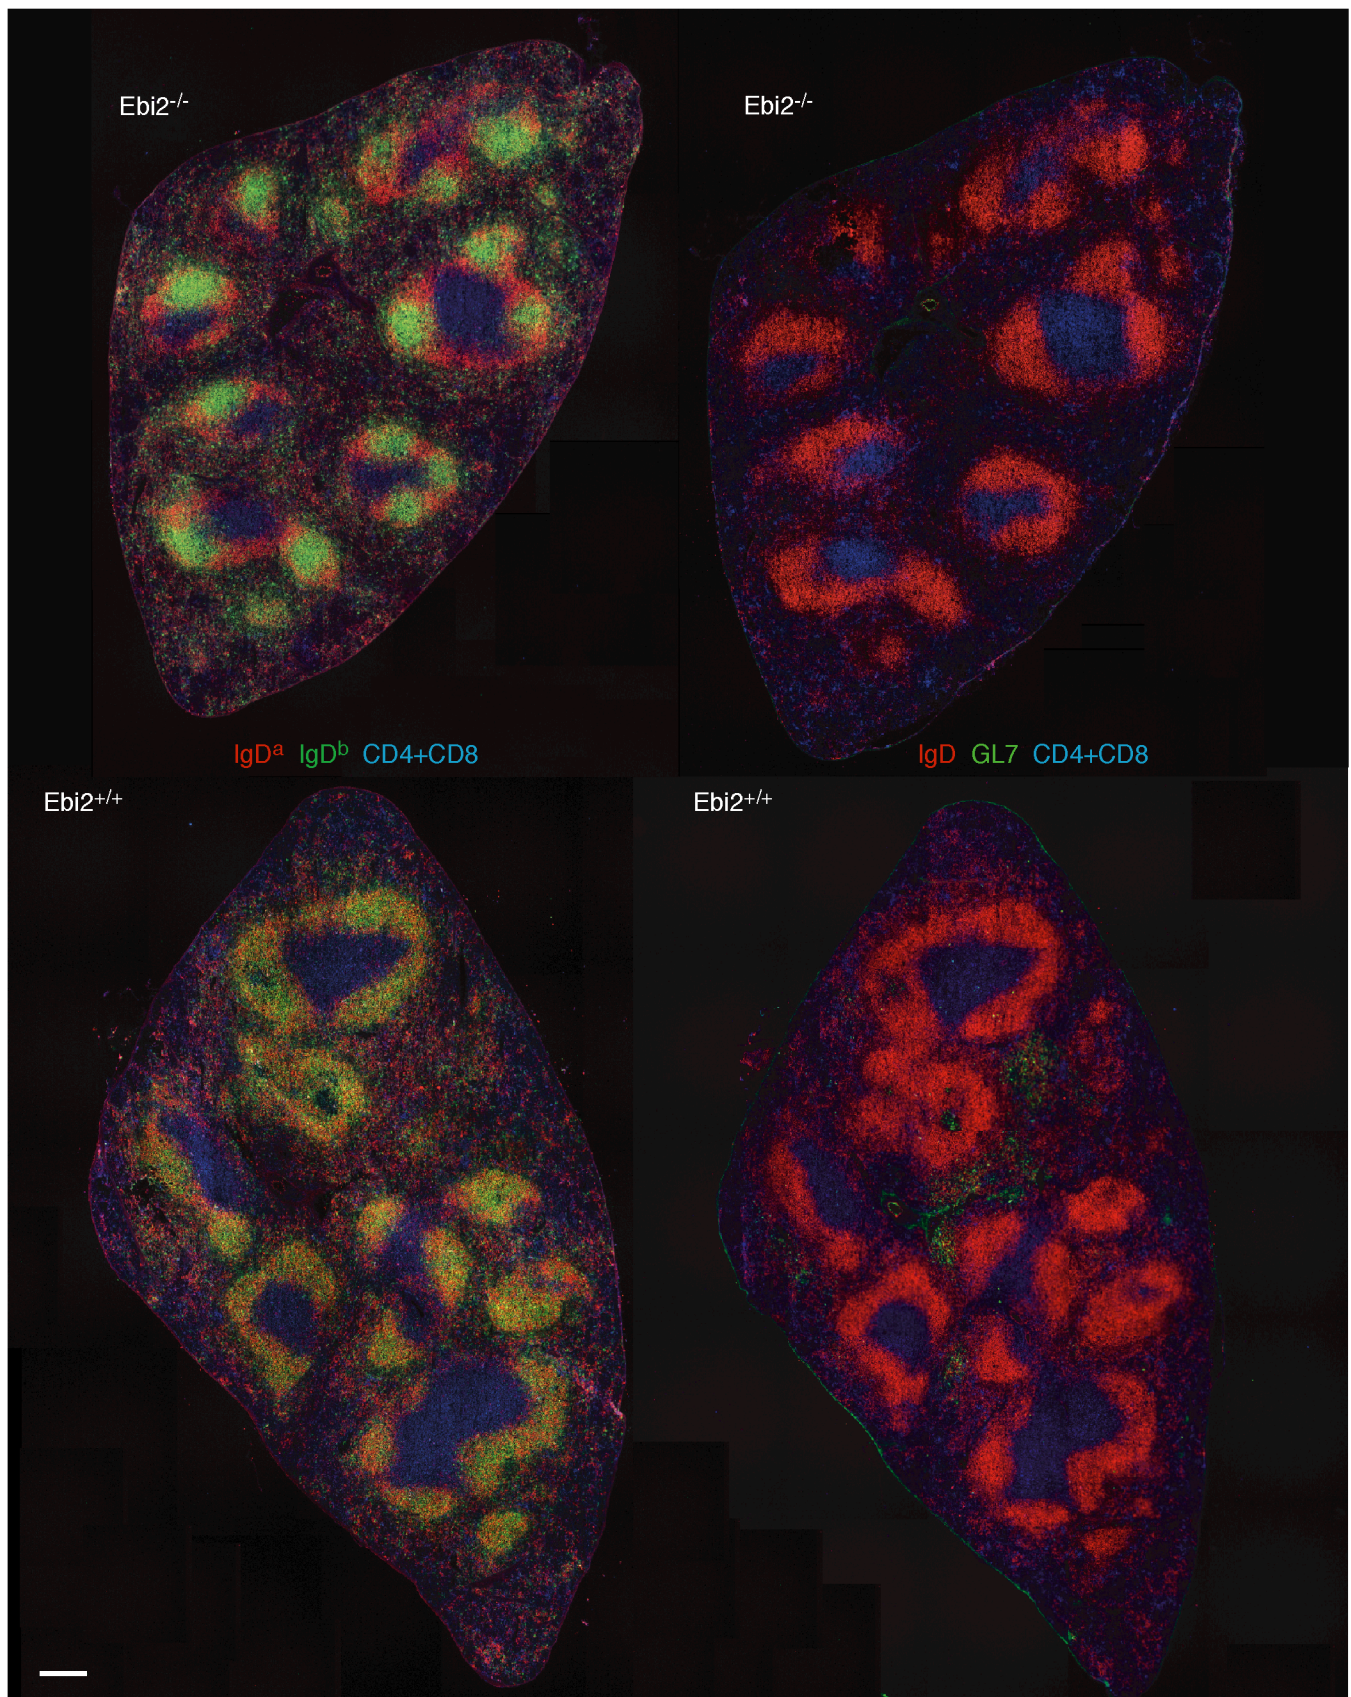

**Supplementary Figure 3. Distribution of *Ebi2*<sup>+/+</sup> and *Ebi2*<sup>-/-</sup> B cells in spleen of mixed BM chimeras.** Chimeras were prepared at a ratio of 20% *Ebi2*<sup>-/-</sup> or *Ebi2*<sup>+/+</sup> (*Igh*<sup>b</sup>) and 80% of *Ebi2*<sup>+/+</sup> (*Igh*<sup>a</sup>) as in Figure 3a. Serial Cryosections were stained with anti-IgD<sup>a</sup> (red), anti-IgD<sup>b</sup> (green), and with anti-CD4+CD8 (blue, left panels), or with anti-GL7 (green), anti-IgD (red), and with anti-CD4+CD8 (blue, right panels). White bar depicts scale (200 $\mu$ m).
