# Supplementary material
Source: PubMed Central journal article supplement (PMC2809436)
Supplement: NIHMS162582-supplement-4.pdf [file NIHMS162582-supplement-4.pdf]

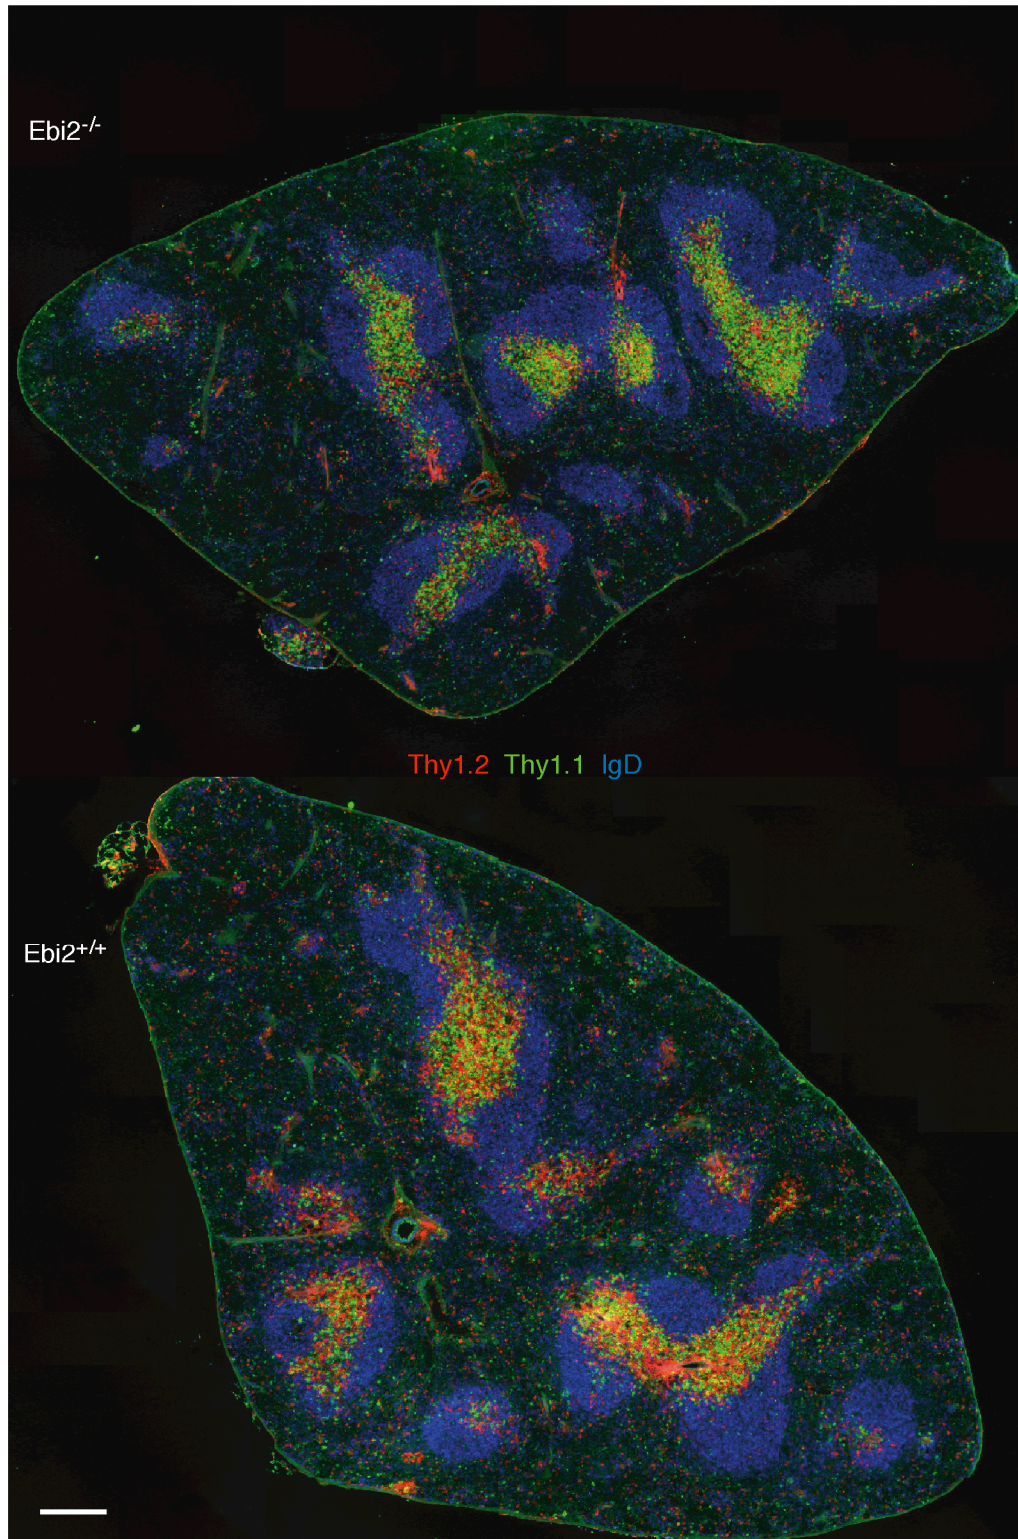

**Supplementary Figure 4. Distribution of  $Ebi2^{+/+}$  and  $Ebi2^{-/-}$  T cells in spleen of mixed BM chimeras.** Chimeras were prepared at a ratio of 20%  $Ebi2^{-/-}$  (Thy1.2) or  $Ebi2^{+/+}$  (Thy1.2) and 80% of  $Ebi2^{+/+}$  (Thy1.1), as in Figure 3a. Cryosections were stained with anti-Thy1.2 (red), anti-Thy1.1 (green), and with anti-IgD (blue, left panels). White bar depicts scale (200 $\mu$ m). Flow cytometric analysis of B and T cell chimerism showed that the hematopoietic reconstitution was approximately 20:80 for the  $Ebi2^{-/-}$  recipient and 40:60 for the  $Ebi2^{+/+}$  recipient.
