# Supplementary material
Source: PubMed Central journal article supplement (PMC2809436)
Supplement: NIHMS162582-supplement-5.pdf [file NIHMS162582-supplement-5.pdf]

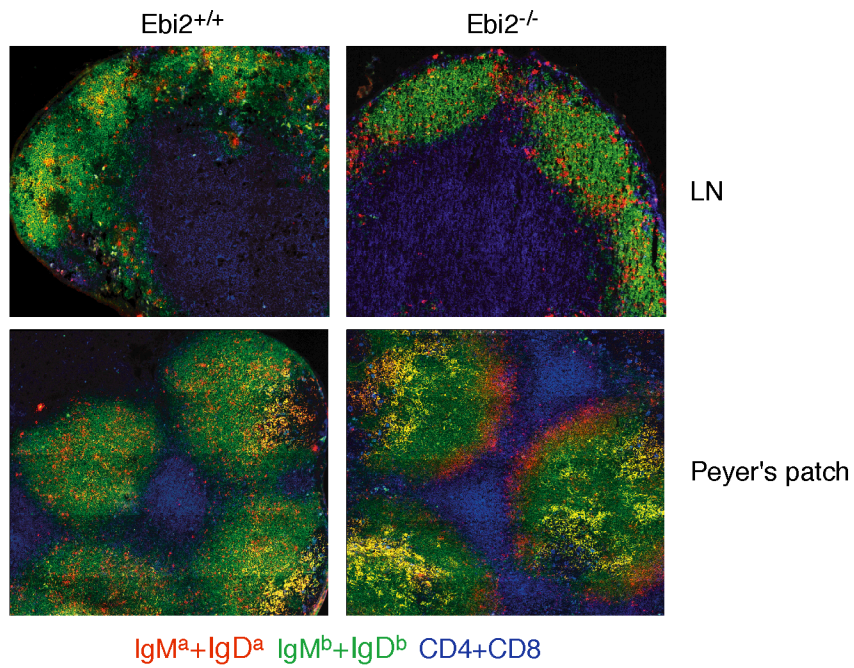

**Supplementary Figure 5. Distribution of Ebi2<sup>+/+</sup> and Ebi2<sup>-/-</sup> B cells in lymph nodes and Peyer's patch of mixed BM chimeras.** Chimeras were prepared at a ratio of 90% Ebi2<sup>-/-</sup> or Ebi2<sup>+/+</sup> (Igh<sup>b</sup>) and 10% of Ebi2<sup>+/+</sup> (Igh<sup>a</sup>) as in Figure 3b. Cryosections were stained with anti-IgM<sup>a</sup>+IgD<sup>a</sup> (red), anti-IgM<sup>b</sup>+IgD<sup>b</sup> (green), and with anti-CD4+CD8 (blue). The FDC network appears in yellow due to deposits of IgM.
