# Supplementary material
Source: PubMed Central journal article supplement (PMC2809436)
Supplement: NIHMS162582-supplement-6.pdf [file NIHMS162582-supplement-6.pdf]

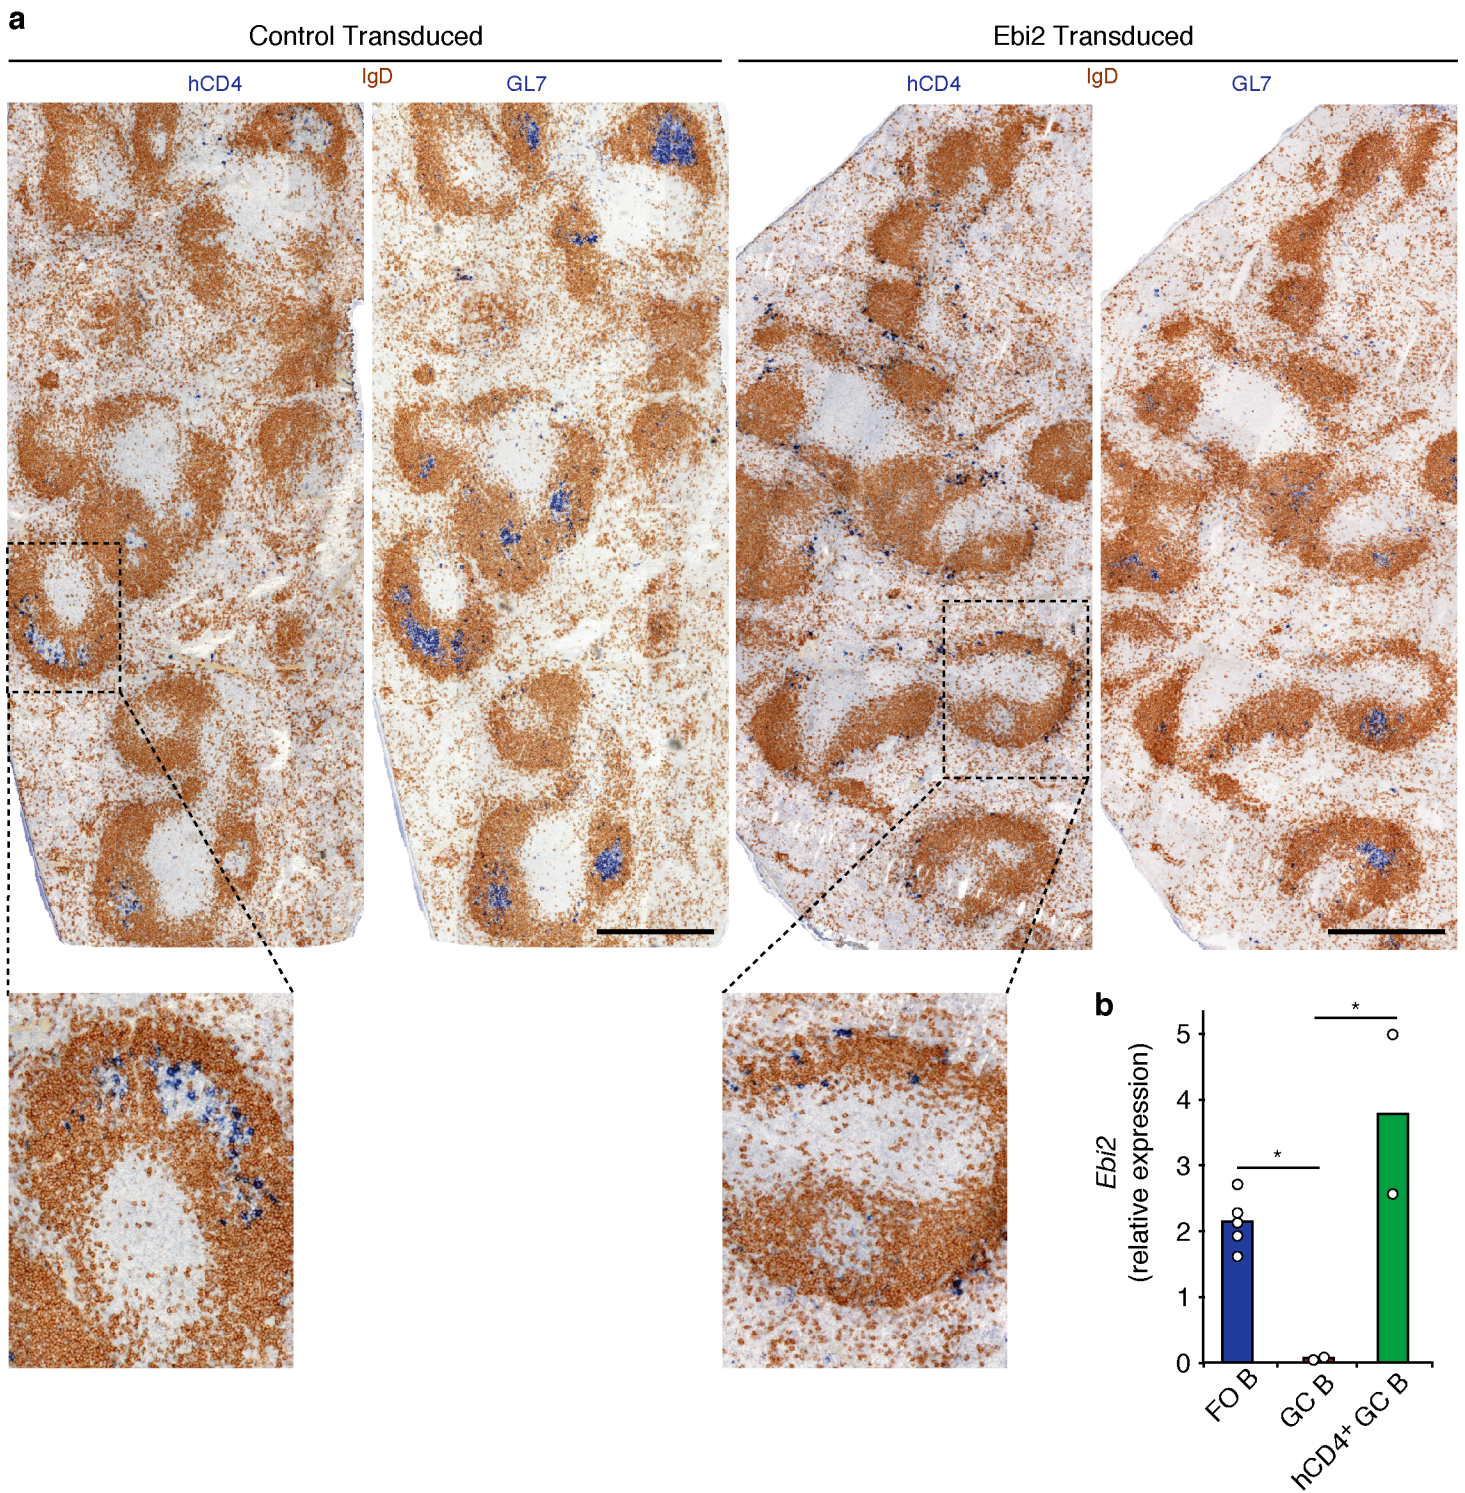

**Supplementary Figure 6. Quantitation of Ebi2 transcripts and further examples showing maintained Ebi2 expression prevents GC B cell positioning in GCs.** (a) Immunohistochemical analysis of spleen cells from an immunized mouse 4 days after transfer of control (left panels) or Ebi2 transduced (right panels) Ig-transgenic B cells (as for the experiment described in Figure 4). Serial cryosections from the indicated mice were stained with anti-IgD (brown), and with anti-hCD4 (blue) or anti-GL7 (blue). Scale bar (black line) is 500 $\mu$ m. Example GCs are shown in the enlargements. (b) Quantitative PCR analysis of Ebi2 expression in purified follicular B (FO B), GC B and Ebi2-transduced (hCD4<sup>+</sup>) GC B cells, presented relative to *Hprt1* expression. Bars indicate the mean; symbols indicate individual mice. \*P<0.05.
